# Supplementary material for: Doping-modulated strain control of bifunctional electrocatalysis for rechargeable zinc–air batteries
Source: Royal Society of Chemistry journal article supplement (doi:10.1039/d1ee01271a), 2021-01-01
Supplement: d1ee01271a2.pdf [file d1ee01271a2.pdf]

**Video S1-3.** Flexible ZABs drive an electrical fan under a bending angle of  $0^\circ$ ,  $90^\circ$ , and  $180^\circ$ , respectively.

**Video S4.** Flexible ZABs drive an electrical fan under continuous bending.
